# Supplementary material
Source: PubMed Central journal article supplement (PMC8007184)
Supplement: mmc1.pdf [file mmc1.pdf]

## Supporting Information

### Novel inhibitors of the main protease enzyme of SARS-CoV-2 identified via molecular dynamics simulation-guided *in vitro* assay

Jennifer Loschwitz<sup>a,b,†</sup>, Anna Jäckeringz<sup>a,†</sup>, Monika Keutmann<sup>a,b</sup>, Maryam Olagunju<sup>a</sup>, Raphael J. Eberle<sup>a,c</sup>, Monika Aparecida Coronado<sup>a</sup>, Olujide O. Olubiyi<sup>a,d,\*</sup> and Birgit Strodel<sup>a,b,\*</sup>

<sup>a</sup>Institute of Biological Information Processing: Structural Biochemistry (IBI-7), Forschungszentrum Jülich, 52428 Jülich, Germany

<sup>b</sup>Institute of Theoretical and Computational Chemistry, Heinrich Heine University Düsseldorf, 40225 Düsseldorf, Germany

<sup>c</sup>Multiuser Center for Biomolecular Innovation, IBILCE, Universidade Estadual Paulista (UNESP), São Jose do Rio Preto-SP, Brazil

<sup>d</sup>Department of Pharmaceutical Chemistry, Faculty of Pharmacy, Obafemi Awolowo University, Ile-Ife, Nigeria

<sup>†</sup>These authors contributed equally.

\*Corresponding authors: olubiyioo@oauife.edu.ng; b.strodel@fz-juelich.de

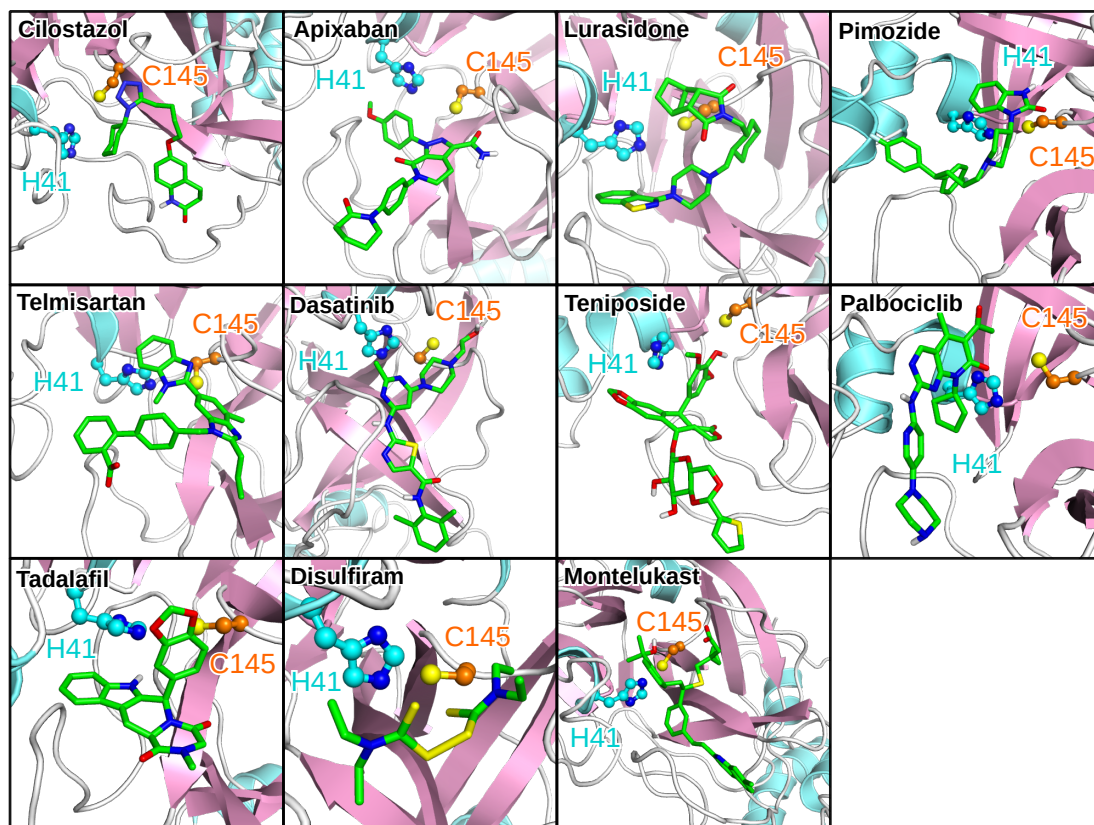

Figure S1.: Binding poses of the eleven FDA-approved drugs belong to top 35 ligands identified by MD simulations.

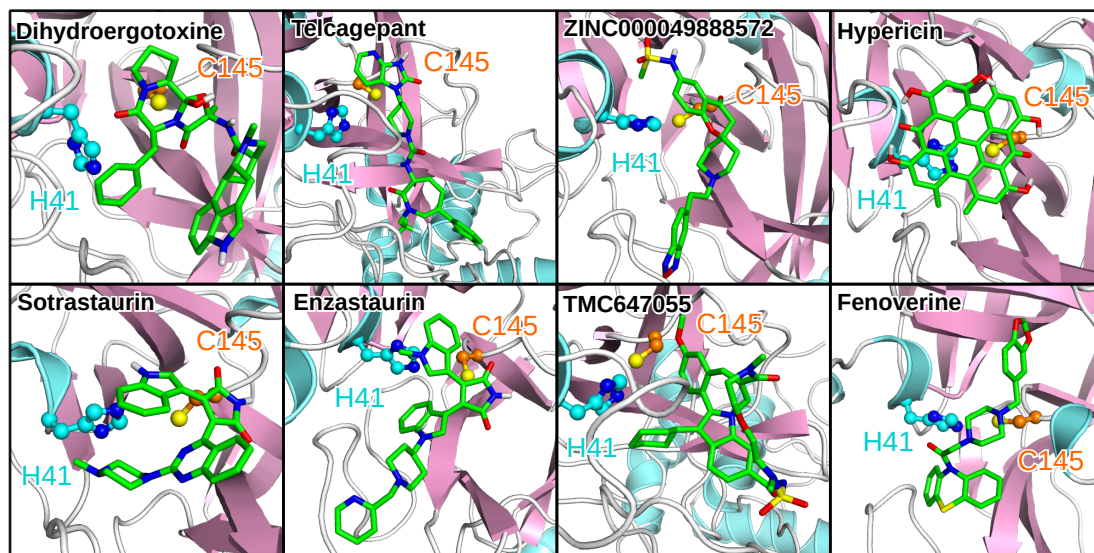

Figure S2.: Binding poses of the eight non-FDA and investigational drugs belong to top 35 ligands identified by MD simulations.

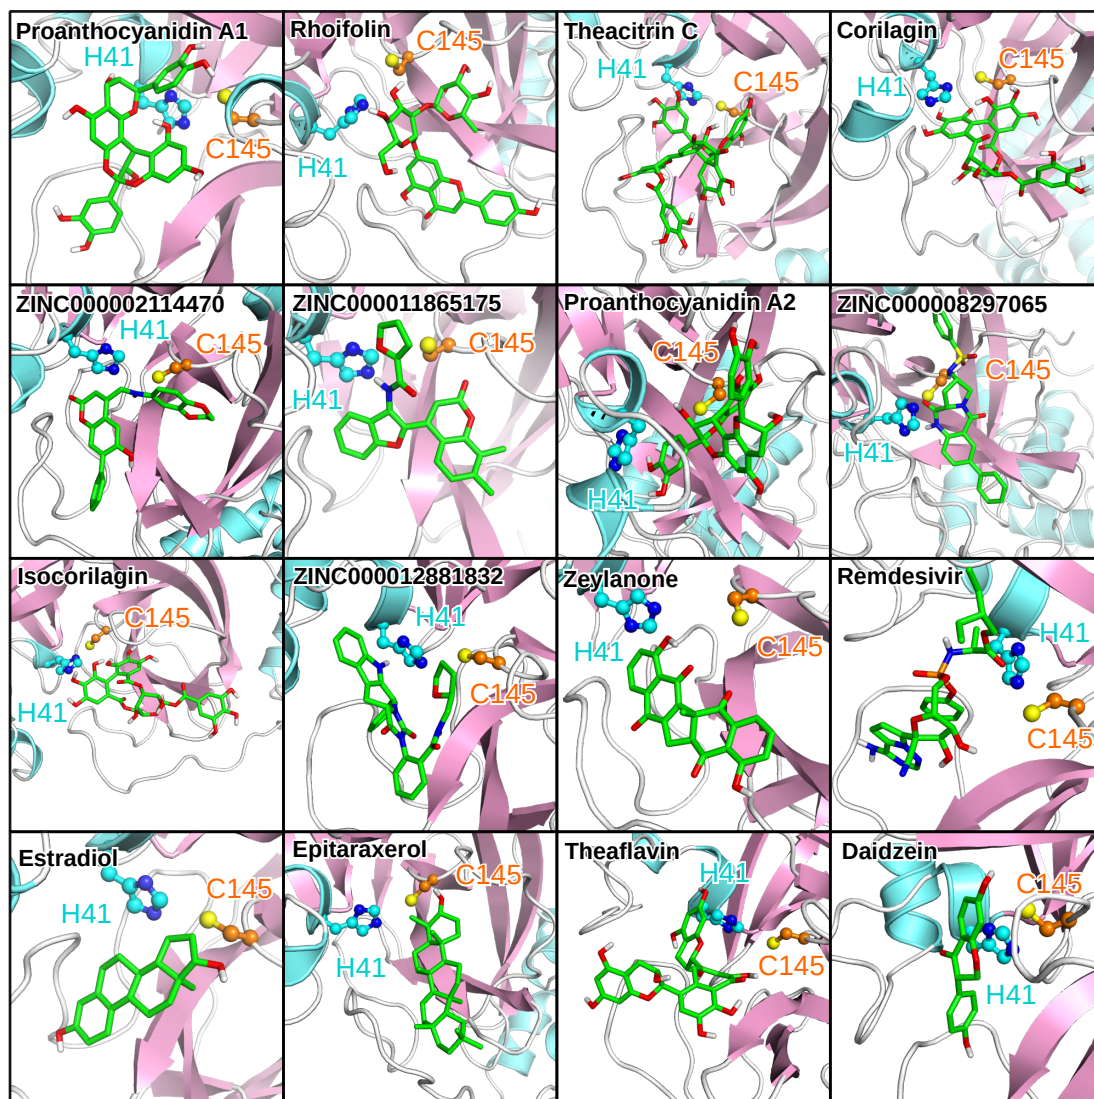

**Figure S3.:** Binding poses of the sixteen natural products belong to top 35 ligands identified by MD simulations.

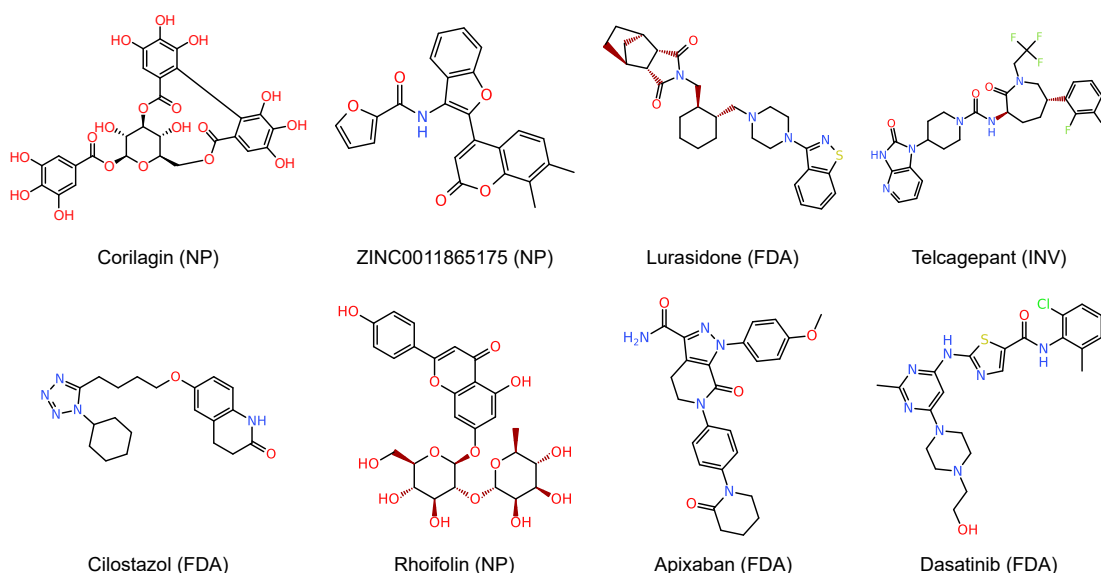

Figure S4.: Chemical structures of the top eight inhibitors.

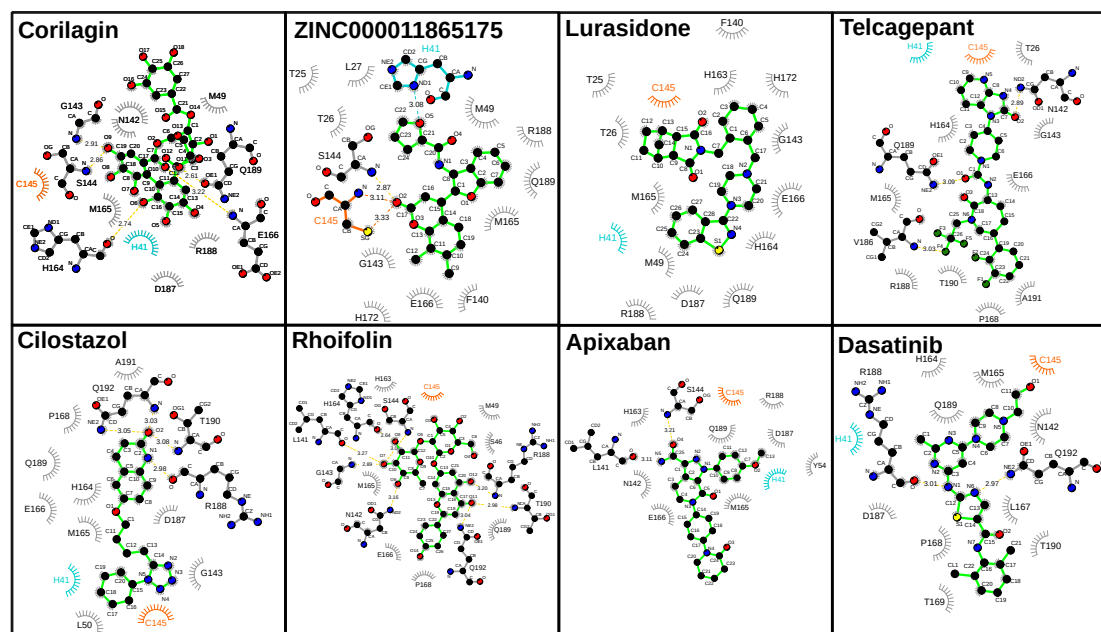

Figure S5.: The 3CL<sup>pro</sup>-ligand interactions for the top eight inhibitors.

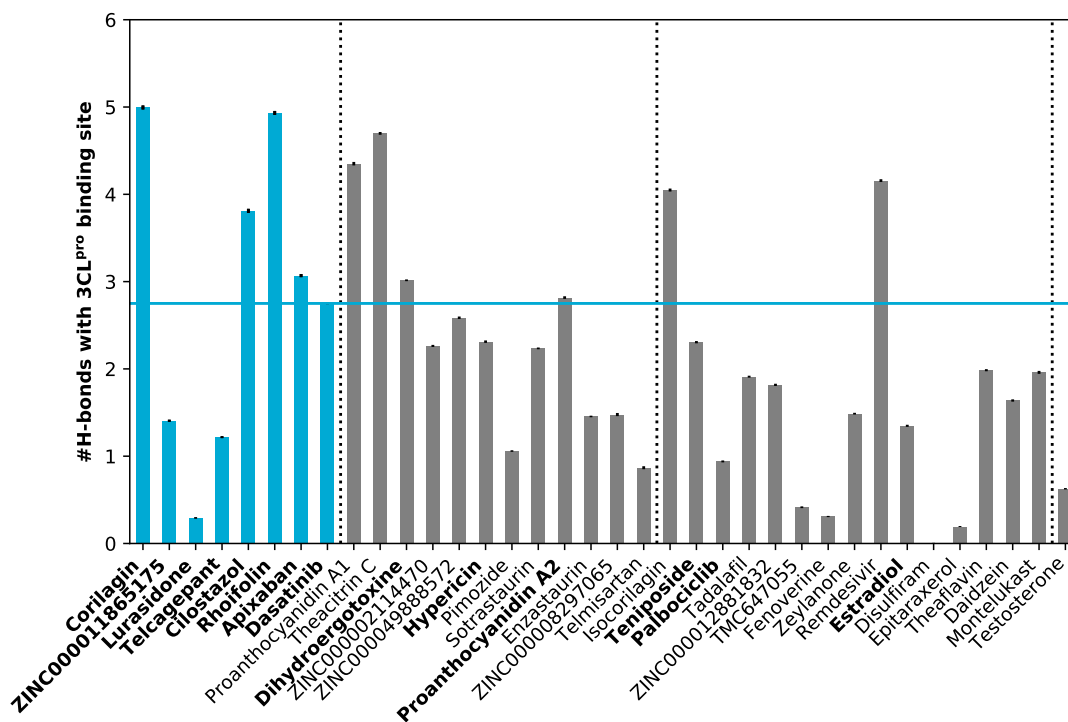

**Figure S6.:** Average number of hydrogen bonds formed between the 3CL<sup>pro</sup> binding site and the 35 top ligands identified by MD simulations. The top eight inhibitors (blue bars) identified by *in vitro* screening are separated by a vertical dashed line from the remaining compounds. Other vertical lines are added to separate the ligands interacting with both dyad residues from those interacting with only one of these residues and to separate testosterone which failed almost all *in silico* selection criteria. The ligands are shown in increasing  $\Delta G_{\text{bind}}$  order. At 2.75 hydrogen bonds a horizontal line (blue) is shown to indicate ligands forming many hydrogen bonds with 3CL<sup>pro</sup>. Labels of the ligands used in the 3CL<sup>pro</sup> inhibition assay are written in bold. The standard deviation is displayed as error bars.

**Table S1.: Names and properties of the compounds submitted to MD simulation.** The  $\text{RMSD}_{\text{ligand}}$  as well as the distances to the catalytic dyad ( $d_{\text{dyad}}$ ) and the binding site ( $d_{\text{BS}}$ ) are values averaged over the last 5 ns of the 20 ns MD simulations and the last 25 ns in the case of the 100 ns MD simulations. The compounds highlighted in bold were identified as the top eight inhibitors.

| No.                       | Accession ID            | Compound name     | Simulation time [ns] | $\text{RMSD}_{\text{ligand}}$ [Å] | $d_{\text{dyad}}$ [Å] | $d_{\text{BS}}$ [Å] |
|---------------------------|-------------------------|-------------------|----------------------|-----------------------------------|-----------------------|---------------------|
| <b>FDA-approved drugs</b> |                         |                   |                      |                                   |                       |                     |
| 1                         | ZINC000006716957        | Nilotinib         | 100 ns               | 9.555                             | 2.722                 | 1.929               |
| 2                         | ZINC000064033452        | Lumacaftor        | 20 ns                | 8.516                             | 2.879                 | 2.243               |
| 3                         | ZINC000003932831        | Dutasteride       | 20 ns                | 6.592                             | 2.935                 | 2.149               |
| 4                         | ZINC000003993855        | Tadalafil         | 100 ns               | 3.643                             | 2.333                 | 1.938               |
| 5                         | ZINC000052955754        | Ergotamine        | 100 ns               | 5.002                             | 2.574                 | 1.920               |
| 6                         | ZINC000100378061        | Naldemedine       | 20 ns                | 6.528                             | 2.549                 | 1.982               |
| 7                         | ZINC000003920266        | Idarubicin        | 100 ns               | 5.082                             | 2.623                 | 2.067               |
| 8                         | ZINC000169289453        | Simeprevir        | 100 ns               | 5.124                             | 2.262                 | 1.887               |
| 9                         | ZINC000013831130        | Raltegravir       | 100 ns               | 6.112                             | 2.510                 | 2.012               |
| 10                        | ZINC000014210642        | Azilsartan        | 100 ns               | 5.026                             | 2.437                 | 1.971               |
| 11                        | ZINC000058581064        | Dolutegravir      | 20 ns                | 11.002                            | 2.266                 | 2.047               |
| <b>12</b>                 | <b>ZINC000003927822</b> | <b>Lurasidone</b> | <b>100 ns</b>        | <b>4.044</b>                      | <b>2.153</b>          | <b>1.963</b>        |
| 13                        | ZINC000004214700        | Paliperidone      | 20 ns                | 3.768                             | 2.712                 | 2.020               |
| 14                        | ZINC000222731806        | Enasidenib        | 20 ns                | 7.767                             | 2.69                  | 2.114               |
| 15                        | ZINC000012503187        | Conivaptan        | 20 ns                | 19.474                            | 10.233                | 1.980               |
| 16                        | ZINC000001530886        | Telmisartan       | 100 ns               | 4.045                             | 2.360                 | 1.908               |
| 17                        | ZINC000003938684        | Etoposide         | 100 ns               | 3.734                             | 2.175                 | 1.874               |
| 18                        | ZINC000029416466        | Saquinavir        | 100 ns               | 4.358                             | 2.327                 | 1.871               |
| 19                        | ZINC000072318121        | Abemaciclib       | 100 ns               | 6.522                             | 2.608                 | 2.050               |
| 20                        | ZINC000008101127        | Indocyanine       | 100 ns               | 5.747                             | 2.303                 | 1.851               |
| 21                        | ZINC000011617039        | Pazopanib         | 100 ns               | 4.566                             | 2.307                 | 1.869               |
| 22                        | ZINC000003938686        | Palbociclib       | 100 ns               | 4.201                             | 2.347                 | 1.942               |
| 23                        | ZINC000004099008        | Teniposide        | 100 ns               | 3.424                             | 2.232                 | 1.796               |
| 24                        | ZINC000035328014        | Ibrutinib         | 20 ns                | 6.041                             | 2.396                 | 2.069               |
| 25                        | ZINC000001530788        | Cromolyn          | 20 ns                | 7.103                             | 2.409                 | 1.996               |
| 26                        | ZINC000043100709        | Trametinib        | 20 ns                | 9.172                             | 2.841                 | 2.133               |

| No.       | Accession ID            | Compound name    | Simulation time [ns] | RMSD <sub>ligand</sub> [Å] | d <sub>dyad</sub> [Å] | d <sub>BS</sub> [Å] |
|-----------|-------------------------|------------------|----------------------|----------------------------|-----------------------|---------------------|
| 27        | ZINC000003831151        | Montelukast      | 100 ns               | 3.494                      | 2.186                 | 1.896               |
| 28        | ZINC000022448696        | Indinavir        | 100 ns               | 5.657                      | 2.571                 | 1.996               |
| 29        | ZINC000040430143        | Olaparib         | 100 ns               | 8.624                      | 2.472                 | 1.957               |
| 30        | ZINC000049036447        | Suvorexant       | 100 ns               | 6.313                      | 2.532                 | 2.107               |
| 31        | ZINC000003976838        | Afatinib         | 100 ns               | 7.933                      | 2.263                 | 1.960               |
| 32        | ZINC000003816514        | Rolapitant       | 100 ns               | 3.556                      | 2.404                 | 2.006               |
| 33        | ZINC000013986658        | Idelalisib       | 100 ns               | 5.302                      | 2.673                 | 1.957               |
| 34        | ZINC000013818943        | Regadenoson      | 20 ns                | 6.904                      | 2.614                 | 1.819               |
| 35        | ZINC000100003902        | Maraviroc        | 20 ns                | 8.464                      | 2.666                 | 2.111               |
| 36        | ZINC000019632618        | Imatinib         | 20 ns                | 8.128                      | 2.279                 | 2.015               |
| 37        | ZINC000003827556        | Delafloxacin     | 20 ns                | 6.271                      | 2.622                 | 1.933               |
| <b>38</b> | <b>ZINC000003986735</b> | <b>Dasatinib</b> | <b>100 ns</b>        | <b>2.552</b>               | <b>2.361</b>          | <b>1.881</b>        |
| 39        | ZINC000027990463        | Lomitapide       | 20 ns                | 7.005                      | 2.688                 | 2.167               |
| 40        | ZINC000003932831        | Candesartan      | 100 ns               | 3.817                      | 2.137                 | 1.867               |
| 41        | ZINC000035902489        | Crizotinib       | 100 ns               | 27.285                     | 18.416                | 10.359              |
| 42        | ZINC000004175630        | Pimozide         | 100 ns               | 3.805                      | 2.382                 | 1.928               |
| 43        | ZINC000019796168        | Sildenafil       | 100 ns               | 7.924                      | 2.563                 | 2.008               |
| 44        | ZINC000043206370        | Niraparib        | 20 ns                | 6.142                      | 2.745                 | 1.985               |
| 45        | ZINC000003918453        | Ertapenem        | 20 ns                | 4.111                      | 3.177                 | 1.813               |
| 46        | ZINC000003860453        | Fluorescein      | 100 ns               | 5.251                      | 2.359                 | 2.059               |
| 47        | ZINC000001481815        | Deferasirox      | 100 ns               | 4.190                      | 2.803                 | 1.857               |
| 48        | ZINC000018324776        | Vardenafil       | 20 ns                | 5.242                      | 2.508                 | 2.038               |
| 49        | ZINC000060325170        | Cobimetinib      | 20 ns                | 5.302                      | 3.078                 | 1.960               |
| 50        | ZINC000100001976        | Glimepiride      | 100 ns               | 5.425                      | 2.388                 | 1.971               |
| 51        | ZINC000001489478        | Sitagliptin      | 20 ns                | 6.793                      | 2.303                 | 2.179               |
| 52        | ZINC000003812865        | Olsalazine       | 100 ns               | 8.607                      | 2.742                 | 2.024               |
| <b>53</b> | <b>ZINC000011677837</b> | <b>Apixaban</b>  | <b>100 ns</b>        | <b>3.024</b>               | <b>2.511</b>          | <b>1.901</b>        |
| 54        | ZINC000005844788        | Nebivolol        | 20 ns                | 6.078                      | 2.624                 | 2.009               |
| 55        | ZINC000000897240        | Azelastine       | 100 ns               | 9.088                      | 2.506                 | 2.056               |
| 56        | ZINC000100022637        | Tipranavir       | 100 ns               | 4.377                      | 2.713                 | 2.087               |



| No.                                      | Accession ID            | Compound name      | Simulation time [ns] | RMSD <sub>ligand</sub> [Å] | d <sub>dyad</sub> [Å] | d <sub>BS</sub> [Å] |
|------------------------------------------|-------------------------|--------------------|----------------------|----------------------------|-----------------------|---------------------|
| <b>57</b>                                | <b>ZINC000001552174</b> | <b>Cilostazol</b>  | <b>100 ns</b>        | <b>4.458</b>               | <b>2.295</b>          | <b>1.856</b>        |
| 58                                       | ZINC000030691797        | Perampanel         | 100 ns               | 5.798                      | 2.642                 | 2.112               |
| 59                                       | ZINC000085537017        | Cangrelor          | 100 ns               | 8.740                      | 2.874                 | 1.817               |
| 60                                       | ZINC000003944422        | Ritonavir          | 20 ns                | 6.620                      | 2.407                 | 2.099               |
| 61                                       | ZINC000001530948        | Thalidomide        | 20 ns                | 6.182                      | 2.556                 | 2.191               |
| <b>Non-FDA and investigational drugs</b> |                         |                    |                      |                            |                       |                     |
| 62                                       | ZINC000003780340        | Hypericin          | 100 ns               | 1.667                      | 2.410                 | 1.865               |
| 63                                       | ZINC000003922429        | Adozelesin         | 20 ns                | 9.524                      | 5.298                 | 2.017               |
| 64                                       | ZINC000003975327        | Telomestatin       | 20 ns                | 11.493                     | 2.487                 | 2.136               |
| 65                                       | ZINC000043203371        | MK-3207            | 100 ns               | 2.822                      | 2.328                 | 1.957               |
| 66                                       | ZINC000059749972        | Radotinib          | 20 ns                | 7.091                      | 2.397                 | 2.114               |
| 67                                       | ZINC000003812168        | Ruboxistaurin      | 100 ns               | 5.198                      | 2.558                 | 1.887               |
| 68                                       | ZINC000084726167        | TMC647055          | 100 ns               | 3.762                      | 2.336                 | 2.083               |
| 69                                       | ZINC000095092808        | —                  | 100 ns               | 8.755                      | 2.386                 | 2.048               |
| 70                                       | ZINC000049888572        | —                  | 100 ns               | 3.592                      | 2.109                 | 1.930               |
| 71                                       | ZINC000095539256        | UK-432,097         | 20 ns                | 6.997                      | 2.237                 | 1.634               |
| 72                                       | ZINC000038576002        | R-343              | 100 ns               | 5.518                      | 2.373                 | 1.942               |
| 73                                       | ZINC000014880002        | Dihydroergotoxine  | 100 ns               | 1.447                      | 2.456                 | 1.810               |
| 74                                       | ZINC000004215648        | Dihydroergocornine | 100 ns               | 6.681                      | 2.260                 | 2.042               |
| 75                                       | ZINC000003817327        | Ly2090314          | 20 ns                | 5.324                      | 3.159                 | 2.103               |
| 76                                       | ZINC000003781738        | Lestaurtinib       | 20 ns                | 4.712                      | 2.776                 | 1.833               |
| 77                                       | ZINC000254071113        | Ciluprevir         | 100 ns               | 6.289                      | 2.626                 | 1.997               |
| 78                                       | ZINC000063933734        | Rebastinib         | 100 ns               | 6.521                      | 2.307                 | 2.048               |
| 79                                       | ZINC000059185874        | GDC-0834           | 100 ns               | 4.908                      | 2.177                 | 1.969               |
| 80                                       | ZINC000043133316        | Tirilazad          | 20 ns                | 9.004                      | 2.701                 | 2.010               |
| 81                                       | ZINC000098208742        | Entospletinib      | 100 ns               | 11.974                     | 5.332                 | 2.051               |
| 82                                       | ZINC000018710085        | —                  | 20 ns                | 9.355                      | 2.998                 | 2.117               |
| 83                                       | ZINC000003930598        | —                  | 100 ns               | 6.666                      | 2.685                 | 2.058               |
| 84                                       | ZINC000004215770        | Elsamitrucin       | 20 ns                | 5.481                      | 3.589                 | 1.803               |
| 85                                       | ZINC000003780800        | Amrubicin          | 100 ns               | 10.287                     | 6.029                 | 1.872               |



| No.                     | Accession ID            | Compound name        | Simulation time [ns] | RMSD <sub>ligand</sub> [Å] | d <sub>dyad</sub> [Å] | d <sub>BS</sub> [Å] |
|-------------------------|-------------------------|----------------------|----------------------|----------------------------|-----------------------|---------------------|
| 86                      | ZINC000001539348        | —                    | 100 ns               | 11.058                     | 2.994                 | 2.030               |
| 87                      | ZINC000003978083        | Tubocurarine         | 100 ns               | 3.920                      | 2.261                 | 1.941               |
| 88                      | ZINC000068250462        | Tucatinib            | 20 ns                | 11.174                     | 2.956                 | 2.081               |
| 89                      | ZINC000001494900        | Enzastaurin          | 100 ns               | 3.692                      | 2.545                 | 1.910               |
| 90                      | ZINC000003950115        | Lonafarnib           | 100 ns               | 5.733                      | 2.490                 | 1.857               |
| 91                      | ZINC000019899628        | Fenoverine           | 100 ns               | 3.677                      | 2.281                 | 2.005               |
| 92                      | ZINC000095535868        | Rwj-58259            | 100 ns               | 8.472                      | 2.433                 | 1.993               |
| 93                      | ZINC000001490807        | —                    | 100 ns               | 4.913                      | 2.323                 | 1.872               |
| 94                      | ZINC000006717782        | BMS-599626           | 100 ns               | 6.066                      | 2.047                 | 1.946               |
| 95                      | ZINC000100001820        | PF-00477736          | 100 ns               | 7.137                      | 2.640                 | 1.922               |
| <b>96</b>               | <b>ZINC000028827350</b> | <b>Telcagepant</b>   | <b>100 ns</b>        | <b>4.156</b>               | <b>2.665</b>          | <b>1.931</b>        |
| 97                      | ZINC000003973984        | Sotrastaurin         | 100 ns               | 1.677                      | 2.143                 | 1.911               |
| 98                      | ZINC000021290045        | —                    | 20 ns                | 6.012                      | 2.332                 | 1.748               |
| 99                      | ZINC000100029945        | Zosuquidar           | 20 ns                | 5.263                      | 3.791                 | 2.066               |
| 100                     | CID121304016            | Remdesivir           | 100 ns               | 4.163                      | 2.421                 | 1.843               |
| <b>Natural products</b> |                         |                      |                      |                            |                       |                     |
| 101                     | ZINC000150352420        | Theacitrin A         | 100 ns               | 6.451                      | 2.307                 | 1.717               |
| <b>102</b>              | <b>ZINC000004098612</b> | <b>Corilagin</b>     | <b>100 ns</b>        | <b>4.102</b>               | <b>2.134</b>          | <b>1.667</b>        |
| 103                     | ZINC000008214976        | Theasinensin B       | 100 ns               | 9.649                      | 2.376                 | 1.721               |
| 104                     | ZINC000169372863        | Theasinensin A       | 20 ns                | 4.085                      | 2.918                 | 1.683               |
| <b>105</b>              | <b>ZINC000003978446</b> | <b>Theaflavin</b>    | <b>100 ns</b>        | <b>3.426</b>               | <b>2.482</b>          | <b>1.847</b>        |
| 106                     | ZINC000004235306        | —                    | 100 ns               | 5.733                      | 2.503                 | 2.114               |
| 107                     | ZINC000230071666        | Theacitrin C         | 100 ns               | 2.309                      | 2.278                 | 1.660               |
| 108                     | ZINC000003984030        | Amentoflavone        | 100 ns               | 3.925                      | 2.396                 | 1.701               |
| 109                     | ZINC000169333962        | Theasinensin F       | 100 ns               | 4.612                      | 2.439                 | 1.851               |
| 110                     | ZINC000001531664        | Ginkgetin            | 20 ns                | 6.071                      | 3.245                 | 2.114               |
| 111                     | ZINC000044351169        | Proanthocyanidin A1  | 100 ns               | 4.011                      | 2.151                 | 1.696               |
| <b>112</b>              | <b>ZINC000003978800</b> | <b>Rhoifolin</b>     | <b>100 ns</b>        | <b>3.114</b>               | <b>2.101</b>          | <b>1.745</b>        |
| 113                     | ZINC000004098619        | Proanthocyanidin A2  | 100 ns               | 3.335                      | 2.584                 | 1.845               |
| 114                     | ZINC000095619717        | Proanthocyanidin A5' | 100 ns               | 7.077                      | 2.685                 | 1.731               |

| No.             | Accession ID            | Compound name                     | Simulation time [ns] | RMSD <sub>ligand</sub> [Å] | d <sub>dyad</sub> [Å] | d <sub>BS</sub> [Å] |
|-----------------|-------------------------|-----------------------------------|----------------------|----------------------------|-----------------------|---------------------|
| 115             | ZINC000003197535        | Isoginkgetin                      | 100 ns               | 5.567                      | 2.396                 | 1.929               |
| 116             | ZINC000014887561        | Zeylanone                         | 100 ns               | 5.009                      | 2.827                 | 1.954               |
| 117             | CID10077799             | Isocorilagin                      | 100 ns               | 3.733                      | 2.250                 | 1.683               |
| 118             | ZINC000003870412        | Epigallocatechin gallate (EGCG)   | 20 ns                | 5.590                      | 3.688                 | 1.572               |
| 119             | ZINC000006624329        | —                                 | 20 ns                | 6.683                      | 2.681                 | 1.952               |
| 120             | ZINC000002148919        | —                                 | 100 ns               | 4.422                      | 2.743                 | 2.102               |
| 121             | ZINC000002107922        | —                                 | 20 ns                | 9.171                      | 4.921                 | 2.176               |
| 122             | ZINC000002161217        | —                                 | 100 ns               | 11.053                     | 2.278                 | 1.829               |
| 123             | ZINC000008297065        | —                                 | 100 ns               | 3.521                      | 2.030                 | 1.992               |
| 124             | ZINC000002125422        | —                                 | 100 ns               | 6.062                      | 2.640                 | 1.952               |
| 125             | ZINC000008764269        | —                                 | 20 ns                | 25.191                     | 11.891                | 3.143               |
| 126             | ZINC000008789992        | —                                 | 20 ns                | 2.944                      | 2.311                 | 1.974               |
| 127             | ZINC000012296408        | —                                 | 100 ns               | 6.046                      | 2.043                 | 1.955               |
| 128             | ZINC000002147804        | —                                 | 100 ns               | 7.889                      | 2.999                 | 1.914               |
| 129             | ZINC000012881832        | —                                 | 100 ns               | 3.545                      | 2.153                 | 1.984               |
| 130             | ZINC000002158857        | —                                 | 20 ns                | 8.281                      | 2.733                 | 2.130               |
| 131             | CID5321811              | Bavacoumestan A                   | 20 ns                | 11.095                     | 2.575                 | 1.919               |
| 132             | ZINC000100828606        | Neodiosmin                        | 100 ns               | 4.959                      | 2.277                 | 1.814               |
| <b>133</b>      | <b>ZINC000011865175</b> | —                                 | <b>100 ns</b>        | <b>1.694</b>               | <b>2.046</b>          | <b>2.012</b>        |
| 134             | ZINC000002114470        | —                                 | 100 ns               | 1.385                      | 2.479                 | 1.817               |
| 135             | ZINC000100777667        | Glabrolide                        | 100 ns               | 8.081                      | 2.663                 | 1.956               |
| 136             | CID12443227             | Epitaraxerol                      | 100 ns               | 2.943                      | 2.263                 | 2.049               |
| 137             | ZINC000004098322        | Homoeriodictyol                   | 20 ns                | 5.386                      | 2.771                 | 1.998               |
| 138             | ZINC000018847034        | Daidzein                          | 100 ns               | 3.937                      | 2.504                 | 1.760               |
| <b>Steroids</b> |                         |                                   |                      |                            |                       |                     |
| 139             | CID27125                | Estetrol                          | 100 ns               | 10.076                     | 8.798                 | 1.928               |
| 140             | ZINC000004340309        | Cortisol                          | 20 ns                | 7.689                      | 2.315                 | 1.870               |
| 141             | CID5757                 | Estradiol                         | 100 ns               | 2.676                      | 2.395                 | 1.880               |
| 142             | ZINC000004428526        | Androstenedione                   | 20 ns                | 11.190                     | 5.440                 | 2.084               |
| 143             | CID91451                | 17- $\alpha$ -hydroxypregnenolone | 20 ns                | 8.524                      | 5.911                 | 1.696               |

| No.                        | Accession ID     | Compound name          | Simulation time [ns] | RMSD <sub>ligand</sub> [Å] | d <sub>dyad</sub> [Å] | d <sub>BS</sub> [Å] |
|----------------------------|------------------|------------------------|----------------------|----------------------------|-----------------------|---------------------|
| 144                        | ZINC000004096681 | 2-Hydroxyestrone       | 20 ns                | 8.524                      | 5.911                 | 1.696               |
| 145                        | ZINC000003815419 | 2-Hydroxyestradiol     | 20 ns                | 6.507                      | 2.591                 | 1.862               |
| 146                        | ZINC000003807917 | Dehydroepiandrosterone | 20 ns                | 9.917                      | 2.253                 | 2.006               |
| 147                        | ZINC000004081043 | Allopregnanolone       | 20 ns                | 10.757                     | 2.565                 | 1.939               |
| 148                        | ZINC000118912393 | Testosterone           | 100 ns               | 7.026                      | 2.430                 | 2.085               |
| <b>Reference compounds</b> |                  |                        |                      |                            |                       |                     |
| 149                        | ZINC000013985228 | Tideglusib             | 20 ns                | 8.488                      | 2.716                 | 1.998               |
| 150                        | PDB 6LU7         | N3                     | 20 ns                | 9.746                      | 2.652                 | 1.878               |
| 151                        | ZINC000001714738 | Cinanserin             | 100 ns               | 6.419                      | 2.498                 | 2.123               |
| 152                        | CID3194          | Ebselen                | 100 ns               | 7.887                      | 2.704                 | 2.090               |
| 153                        | ZINC000001542916 | Carmofur               | 20 ns                | 8.433                      | 2.544                 | 2.023               |
| 154                        | ZINC000013209429 | PX-12                  | 20 ns                | 6.963                      | 2.706                 | 2.127               |
| 155                        | ZINC000001529266 | Disulfiram             | 100 ns               | 3.602                      | 2.317                 | 2.102               |
| 156                        | ZINC000002015152 | Shikonin               | 20 ns                | 6.963                      | 2.706                 | 2.127               |
| 157                        | —                | Inhibitor 11r          | 20 ns                | 7.280                      | 2.422                 | 1.895               |
| 158                        | —                | Inhibitor 13a          | 20 ns                | 5.306                      | 2.369                 | 1.960               |
| 159                        | —                | Inhibitor 13b          | 20 ns                | 8.298                      | 2.362                 | 1.984               |
| 160                        | —                | Inhibitor 14b          | 20 ns                | 5.642                      | 2.369                 | 1.930               |
